# Supplementary material for: Nano-confinement-inspired metal organic framework/polymer composite separation membranes
Source: Royal Society of Chemistry journal article supplement (doi:10.1039/d0ta02412k), 2020-01-01
Supplement: d0ta02412k1.pdf [file d0ta02412k1.pdf]

## Electronic Supplementary Information

### **Nano-confinement-inspired metal organic framework/polymer composite separation membranes**

*Xiaoting Li,<sup>a</sup> Naixin Wang,<sup>a\*</sup> Xinmin Bao,<sup>a</sup> Qian Li,<sup>a</sup> Jie Li,<sup>a</sup> Ya-Bo Xie,<sup>a</sup> Shulan Ji,<sup>a</sup> Jiayin Yuan,<sup>b</sup> Quan-Fu An<sup>a\*</sup>*

#### Preparation of other MOF particles suspension

ZIF-8 nanocrystals were synthesized at room temperature. 3.28 g 2-methylimidazole (H-mim) was dissolved in 30 mL of ethanol; then 1.48 g Zn(NO<sub>3</sub>)<sub>2</sub> and 0.01 g Cetyl trimethyl ammonium bromide (CTAB) was dissolved in 20 mL of water. The two solutions were mixed under stirring for 0.5 h at room temperature. Then, the suspension of nanocrystals was separated by centrifugation with 6000 rpm for 0.5 h.

ZIF-11 nanocrystals were synthesized at room temperature. 2.4 g Bim was dissolved in 30 mL of ethanol; then 2.2 g Zn(NO<sub>3</sub>)<sub>2</sub> was dissolved in the mixed solvent (10 mL of ethanol and 10 mL of toluene). The two solutions were mixed under stirring for 0.5 h at room temperature. Then the suspension of nanocrystals was separated by centrifugation with 6000 rpm for 0.5 h.

ZIF-12 nanocrystals were synthesized at room temperature. 2.4 g Bim was dissolved in 30 mL of ethanol; then 2.9 g Co(NO<sub>3</sub>)<sub>2</sub> was dissolved in the mixed solvent (10 mL of ethanol and 10 mL of toluene). The two solutions were mixed under stirring for 0.5 h at room temperature. Then, the suspension of nanocrystals was separated by centrifugation 6000 rpm for 0.5 h.

CuBTC nanocrystals were synthesized at room temperature. 0.9 g H<sub>3</sub>BTC and 1.66 mL trimethylamine were dissolved in 30 mL of ethanol; then 1 g Cu(NO<sub>3</sub>)<sub>2</sub> and 0.36 g CTAB was dissolved in the 100 mL water. The two solutions were mixed under stirring for 0.5 h at room temperature. Then, the suspension of nanocrystals was separated by centrifugation with 6000 rpm for 0.5 h.

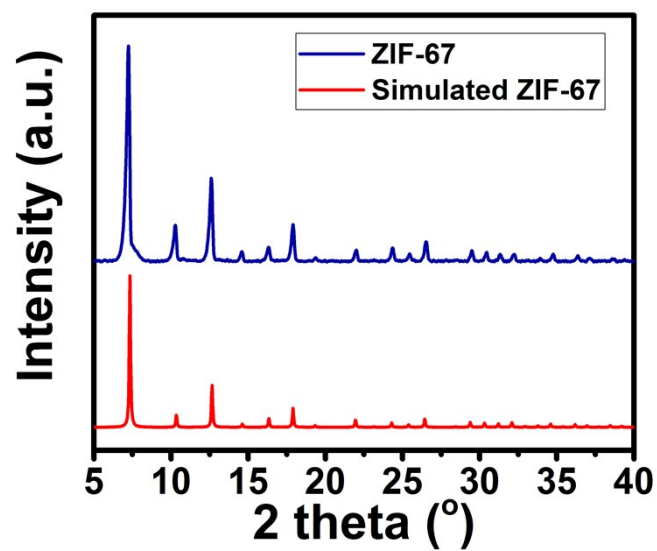

Fig. S1. PXRD patterns of synthetic and simulated ZIF-67 crystals.

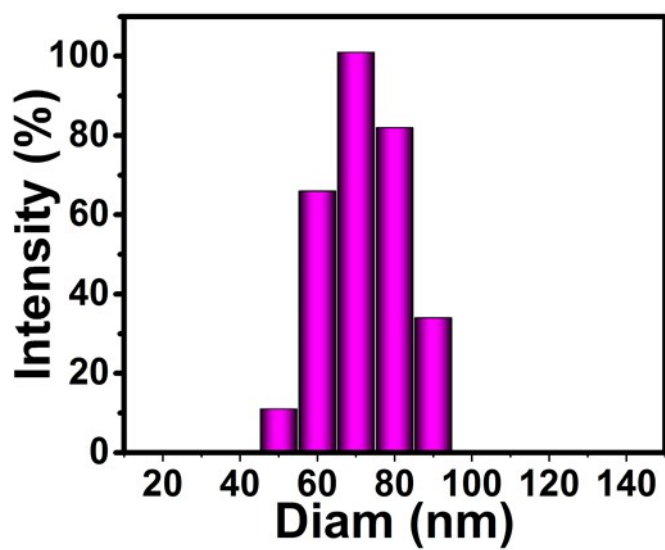

Fig. S2. Particle size distribution of ZIF-67 nanoparticles in solution.

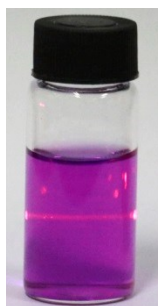

**Fig. S3.** Digital photograph of a ZIF-67 suspension in ethanol with Tyndall effects.

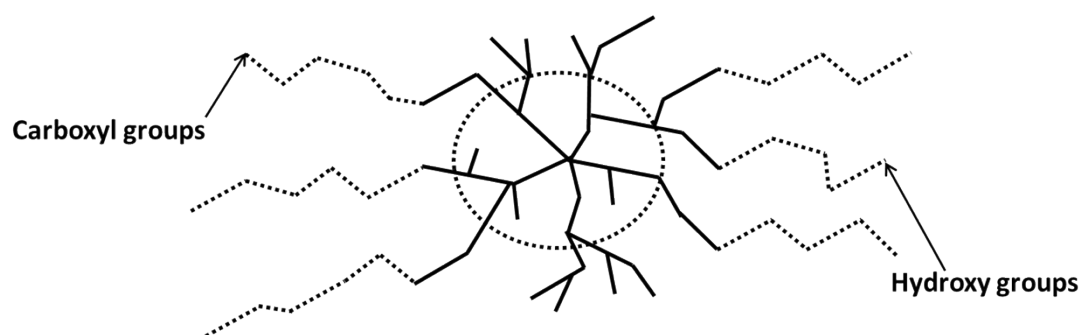

**Fig. S4.** Schematic representation of HBP Boltorn W3000 molecular structure.

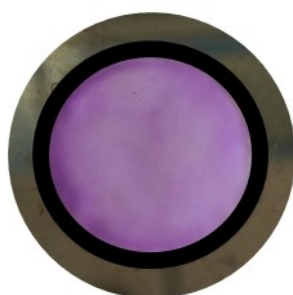

**Fig. S5.** Digital photograph of the ZIF-67/W3000-nc membrane on PS support.

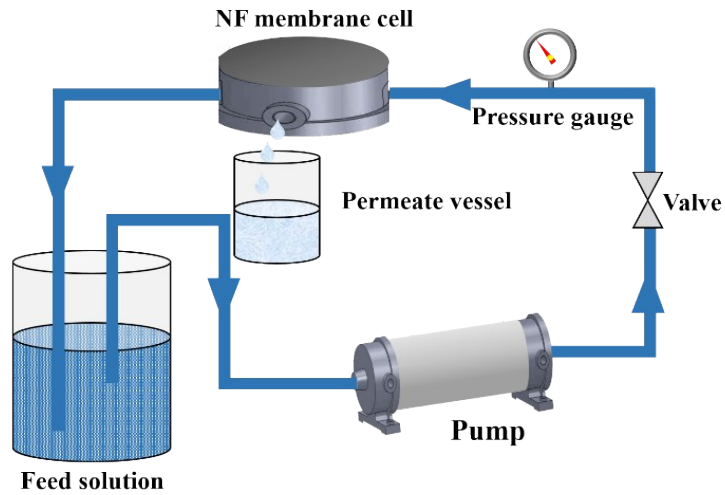

**Fig. S6.** Schematic diagram of a flat-sheet cross-flow separation device.

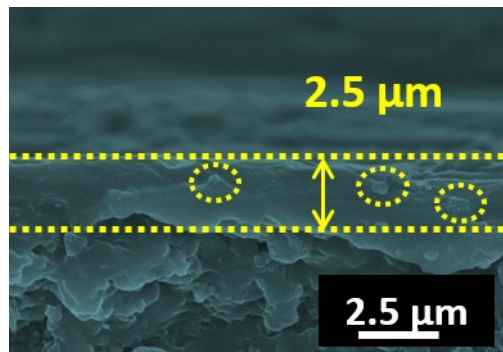

**Fig. S7.** The cross-sectional SEM image ZIF-67/W3000-tr membrane on PS support.

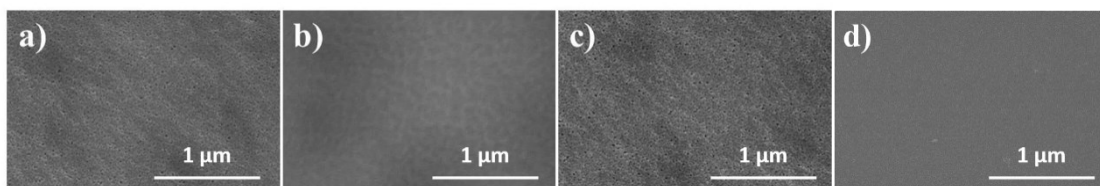

**Fig. S8.** Top-view SEM images of a) PS support; b) W3000 membrane; c) ZIF-67 membrane; ZIF-67/W3000-nc membrane.

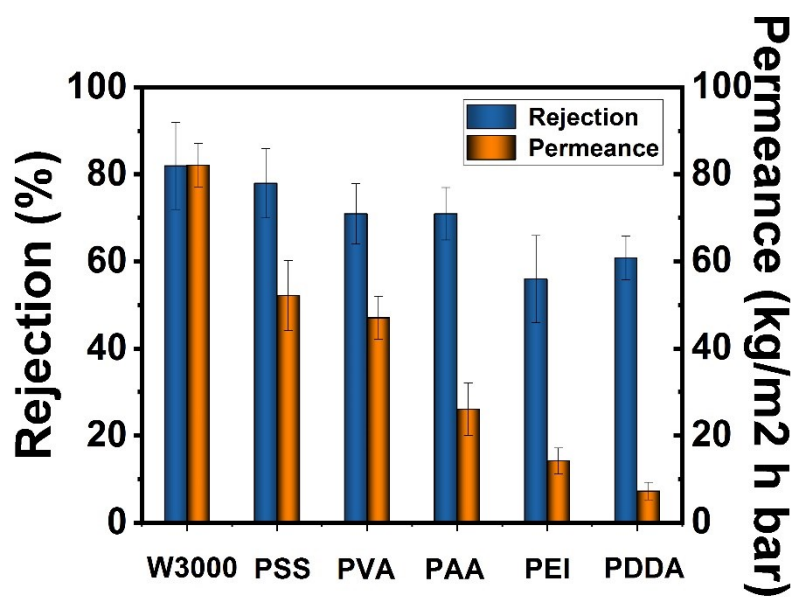

**Fig. S9.** Desalination performance of ZIF-67/polymer-nc membranes with different polymers. (Separation condition: 100 mg/L Na<sub>2</sub>SO<sub>4</sub> aqueous solution)

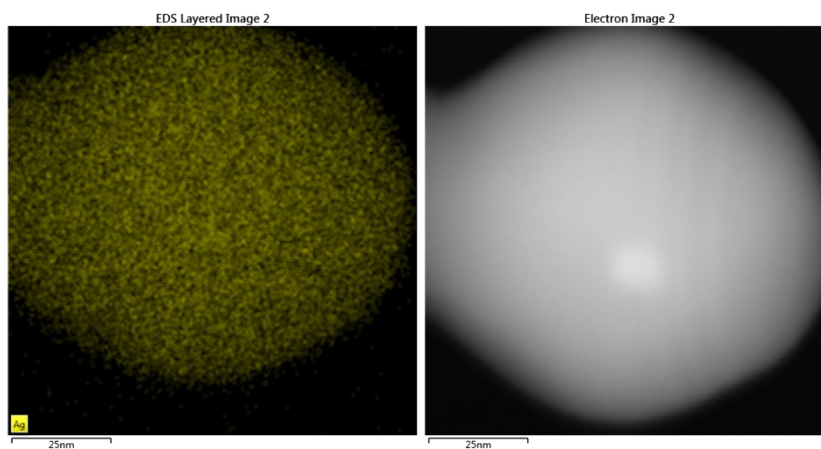

**Fig. S10.** EDX mapping and TEM images of Ag particles.

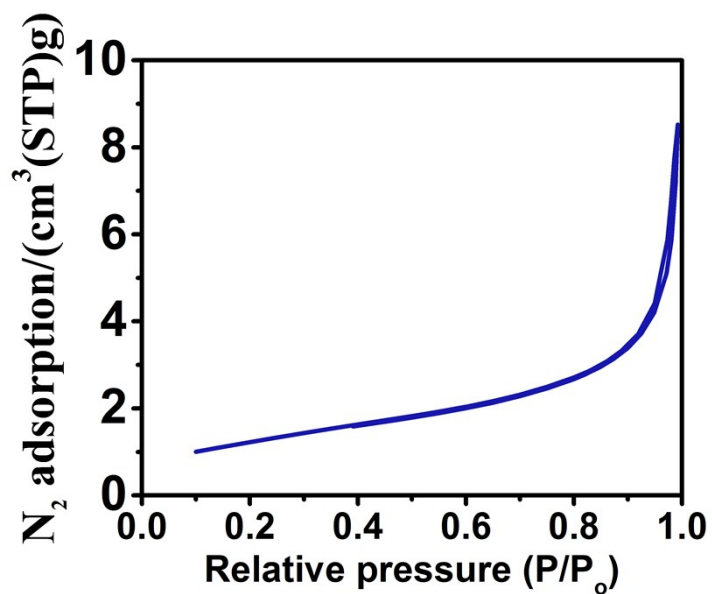

Fig. S11. N<sub>2</sub> sorption isotherms of Ag particles.

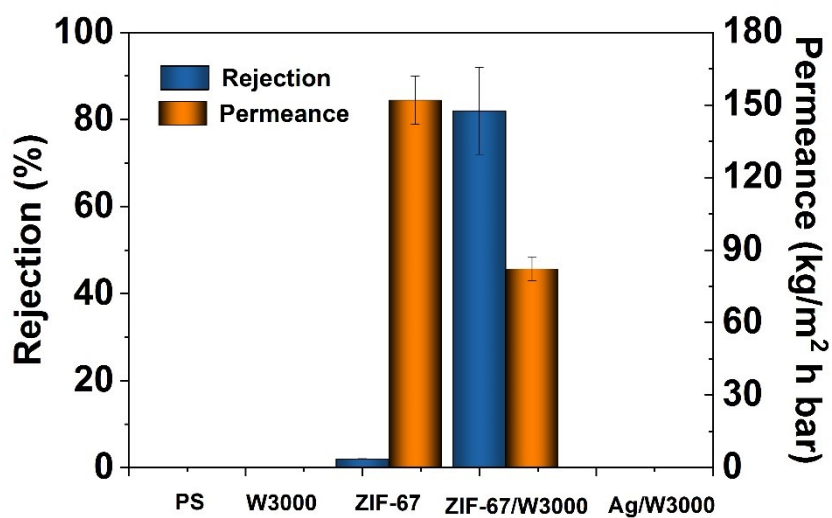

Fig. S12. Desalination performance of different kinds of membranes.  
(Separation condition: 100 mg/L Na<sub>2</sub>SO<sub>4</sub> aqueous solution)

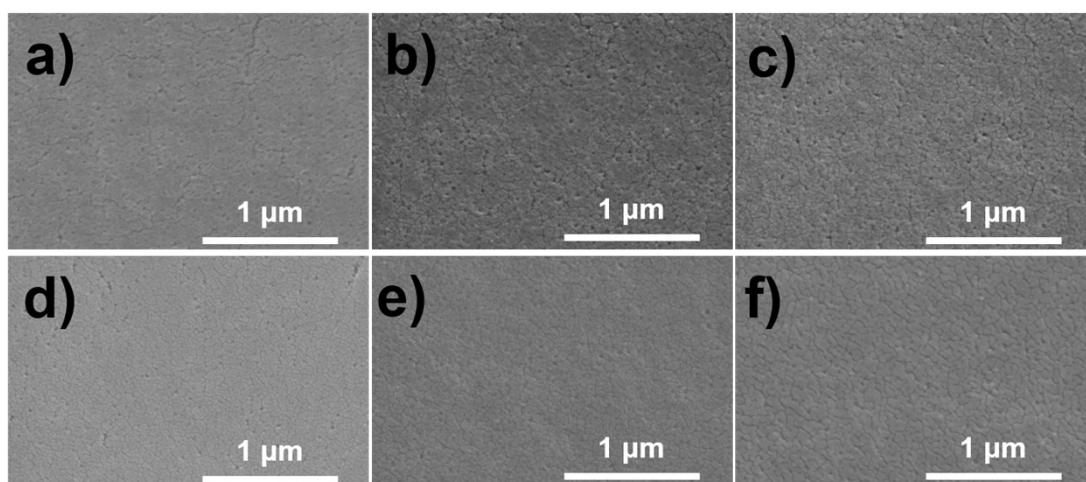

**Fig. S13.** Surface SEM images of a) PS support and PS support with different annealing temperature: b) 90 °C; c) 100 °C; d) 110 °C; e) 120 °C; f) 130 °C.

**Table S1.** Pore size and porosity for PS support before and after heated.

|                                       | PS support | Heated PS support |
|---------------------------------------|------------|-------------------|
| Most probable aperture/ $\mu\text{m}$ | 0.21       | 0.065             |
| Minimum pore size/ $\mu\text{m}$      | 0.079      | 0.063             |
| Average pore size/ $\mu\text{m}$      | 0.17       | 0.095             |
| Porosity/%                            | 61         | 49                |

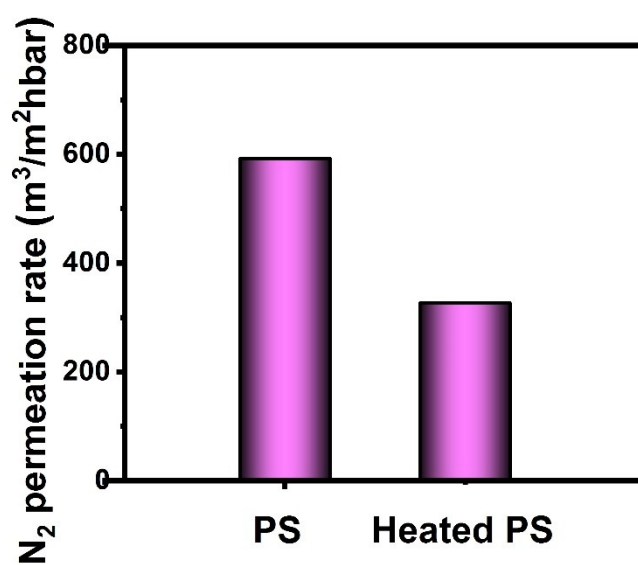

**Fig. S14.**  $\text{N}_2$  permeation rate for a PS support before and after being heated.

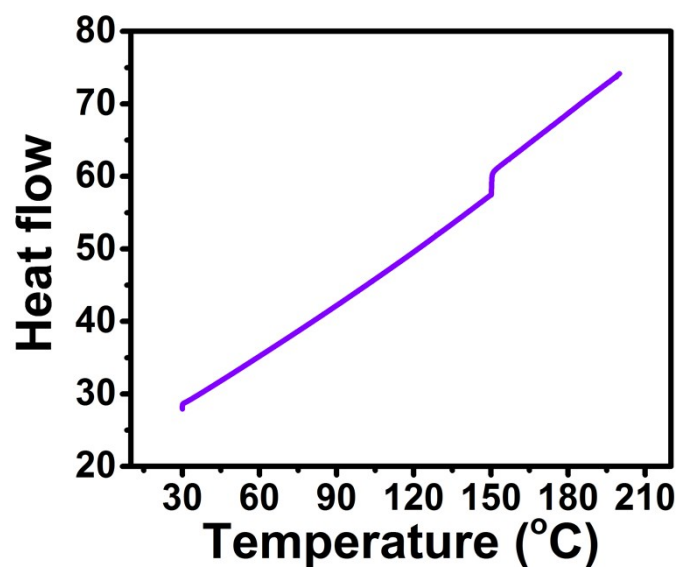

Fig. S15. DSC trace of the PS support.

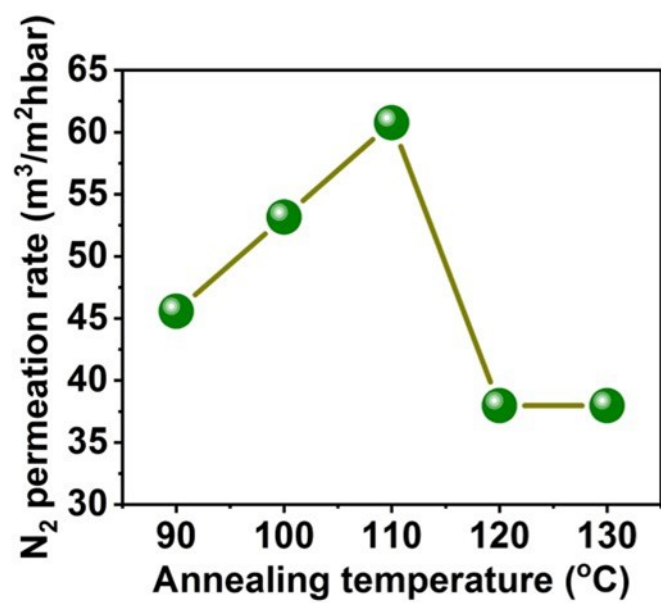

Fig. S16. N<sub>2</sub> permeation rate of ZIF-67/W3000-nc membrane at different annealing temperatures.



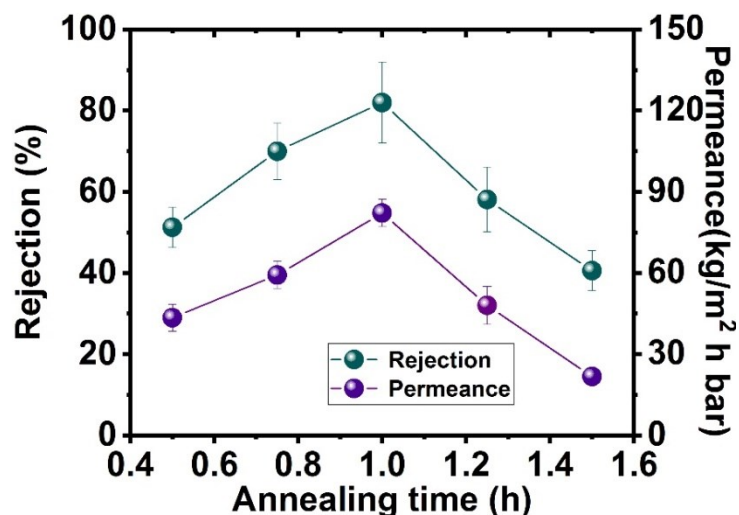

**Fig. S17.** Effects of annealing time on the separation performance of the ZIF-67/W3000-nc membranes. (Separation condition: 100 mg/L Na<sub>2</sub>SO<sub>4</sub> aqueous solution)  
 (Preparation conditions:  $C_{Co(NO_3)_2} = 1.6$  mol/mL;  $C_{H-mim} = 0.5$  mol/mL; concentration of W3000, 0.05 wt.%; liquid level interval, 6 cm; annealing temperature, 110 °C)

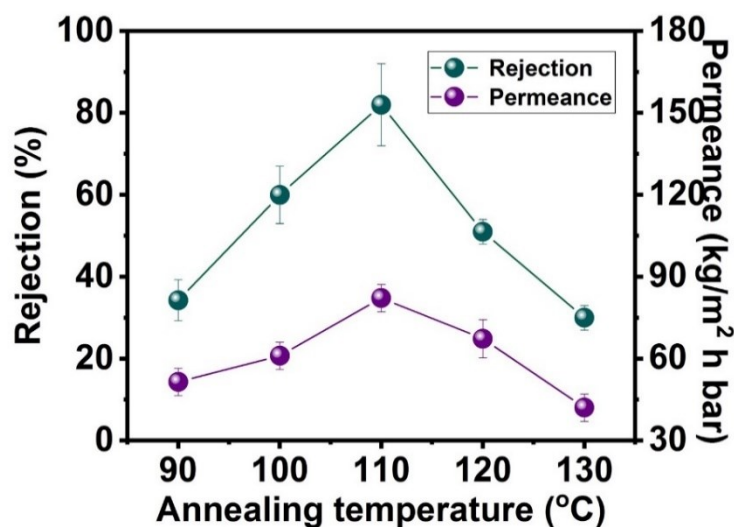

**Fig. S18.** Effects of annealing temperature s on the separation performance of the ZIF-67/W3000-nc membranes.  
 (Separation condition: 100 mg/L Na<sub>2</sub>SO<sub>4</sub> aqueous solution)  
 (Preparation conditions:  $C_{Co(NO_3)_2} = 1.6$  mol/mL;  $C_{H-mim} = 0.5$  mol/mL; concentration of W3000, 0.05wt.%; liquid level interval, 6 cm; contra-diffusion time, 5 min; annealing time, 1 h)

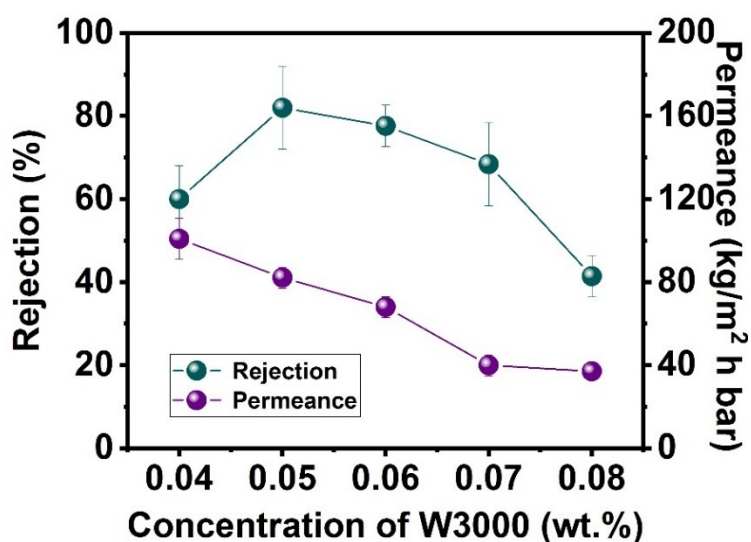

**Fig. S19.** Effects of W3000 concentration on the separation performance of the ZIF-67/W3000-nc membranes.

(Separation condition: 100 mg/L Na<sub>2</sub>SO<sub>4</sub> aqueous solution)

(Preparation conditions: C<sub>Co(NO<sub>3</sub>)<sub>2</sub></sub> = 1.6 mol/mL; C<sub>H-mim</sub> = 0.5 mol/mL; liquid level interval, 6 cm; contra-diffusion time, 5 min; annealing time, 1 h; annealing temperature, 110 °C)

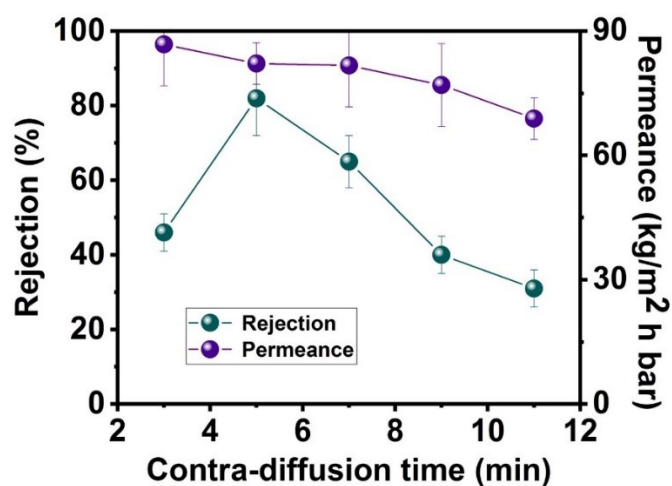

**Fig. S20.** Effects of contra-diffusion time on the separation performance of the ZIF-67/W3000-nc membranes.

(Separation condition: 100 mg/L Na<sub>2</sub>SO<sub>4</sub> aqueous solution)

(Preparation conditions: C<sub>Co(NO<sub>3</sub>)<sub>2</sub></sub> = 1.6 mol/mL; C<sub>H-mim</sub> = 0.5 mol/mL; concentration of W3000, 0.05wt.%; liquid level interval, 6 cm; annealing time, 1 h; annealing temperature, 110 °C)

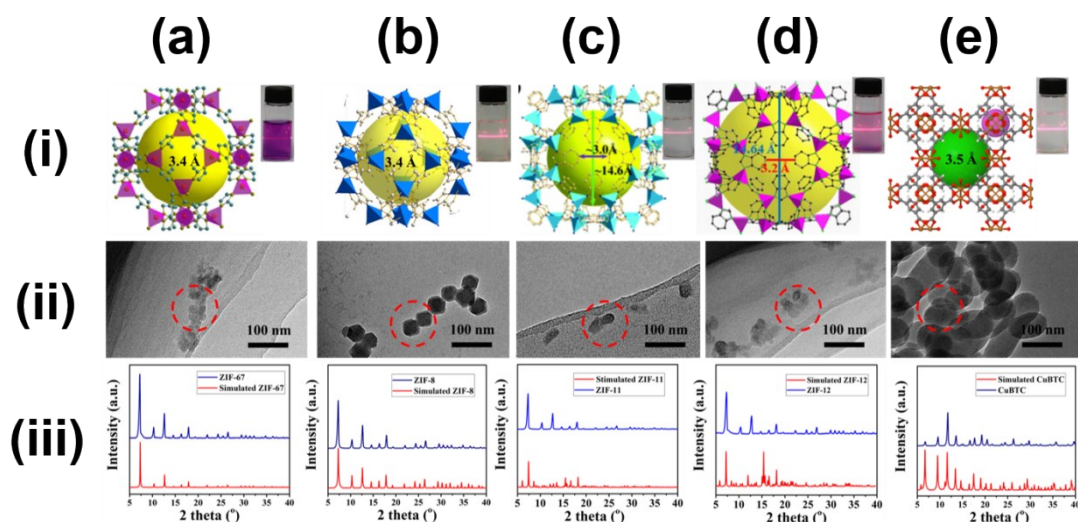

**Fig. S21.** a) ZIF-67; b) ZIF-8; c) ZIF-11; d) ZIF-12; e) HKUST-1 crystals with i)-iii) TEM images and PXRD patterns.

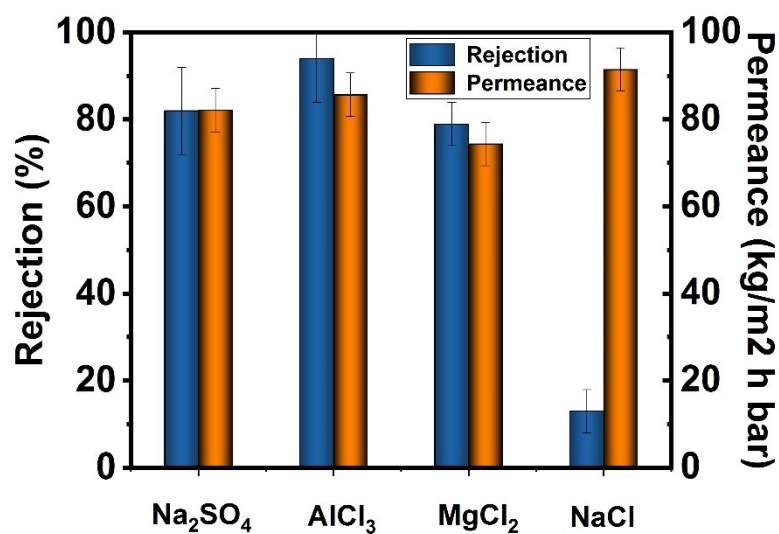

**Fig. S22.** Separation performance of the ZIF-67/w3000-nc membranes.

(Separation condition: 100 mg/L Na<sub>2</sub>SO<sub>4</sub>, AlCl<sub>3</sub>, MgCl<sub>2</sub>, NaCl aqueous solution)

(Preparation conditions: C<sub>Co(NO<sub>3</sub>)<sub>2</sub></sub> = 1.6 mol/mL; C<sub>H-mim</sub> = 0.5 mol/mL; concentration of W3000, 0.05wt.%; liquid level interval, 6 cm; annealing time, 1 h; annealing temperature, 110 °C)

**Table S2.** Pore size of different polymer supports.

|                                       | PS support | PVDF support | PAN support | PES support |
|---------------------------------------|------------|--------------|-------------|-------------|
| Most probable aperture/ $\mu\text{m}$ | 0.21       | 0.28         | 0.039       | 0.017       |
| Minimum pore size/ $\mu\text{m}$      | 0.079      | 0.23         | 0.016       | 0.011       |
| Average pore size/ $\mu\text{m}$      | 0.17       | 0.29         | 0.027       | 0.023       |

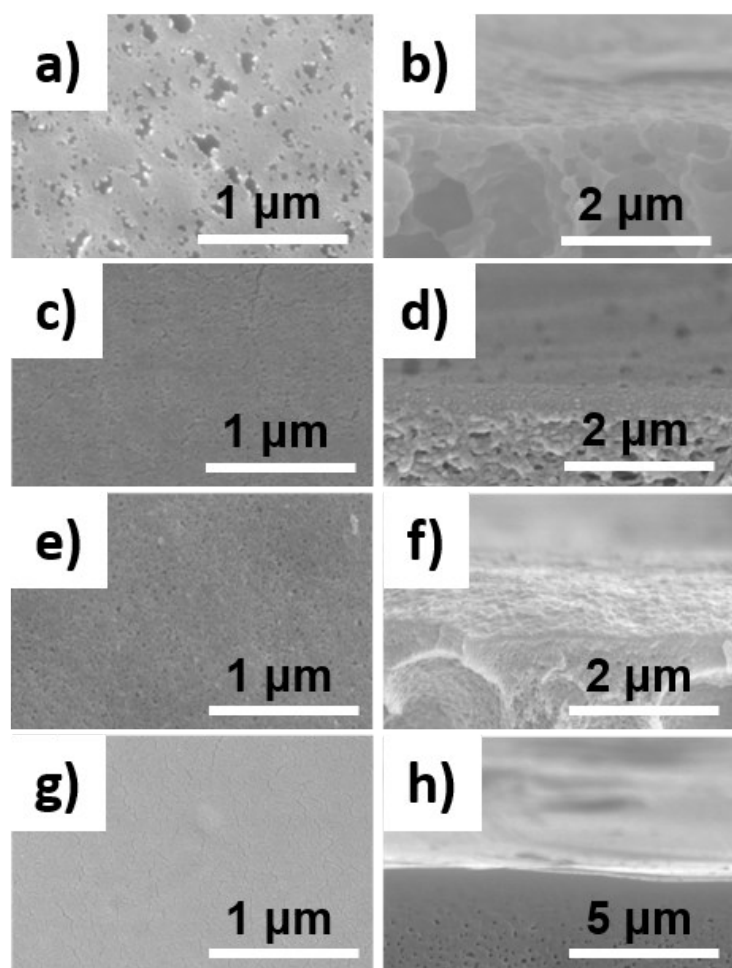

**Fig. S23.** Top-view and cross-section images of different polymer supports: a-b) PVDF support; c-d) PS support; e-f) PAN support; g-h) PES support.

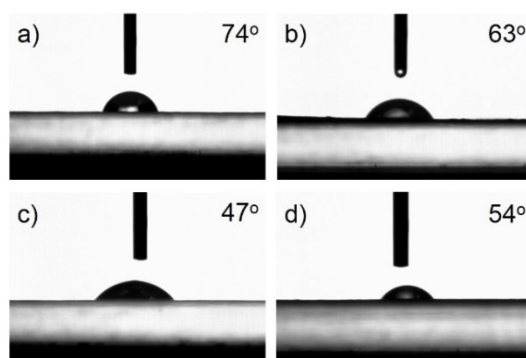

**Fig. S24.** Static water contact-angle of various substrates. a) PVDF; b) PS; c) PAN; d) PES.

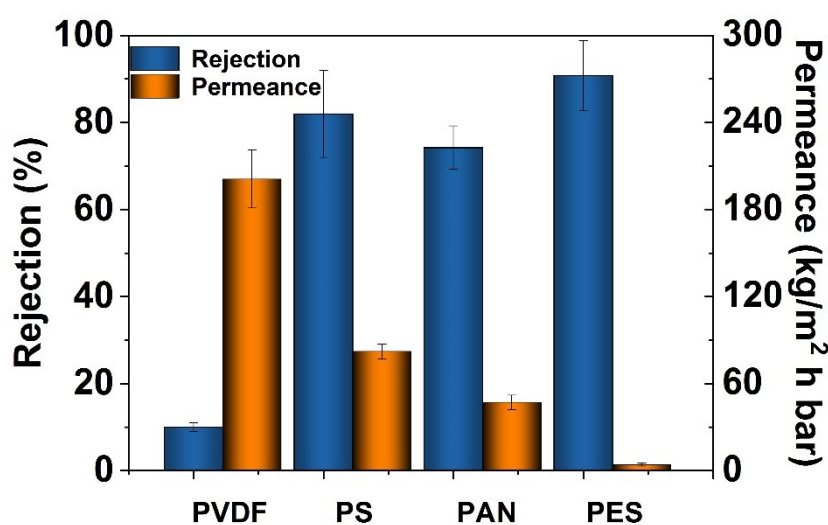

**Fig. S25.** Effects of polymer supports on the desalination performance of membranes.

(Separation condition: 100 mg/L Na<sub>2</sub>SO<sub>4</sub> aqueous solution)

(Preparation conditions:  $C_{\text{Co(NO}_3)_2}$  = 1.6 mol/mL;  $C_{\text{H-mim}}$  = 0.5 mol/mL; concentration of W3000, 0.05 wt.%; liquid level interval, 6 cm; annealing time, 1 h; annealing temperature, 110 °C)

### Supplementary References

- [1] J. Kujawa, S. Cerneaux, X. Kujawski, *J. Membr. Sci.*, 2015, **474**, 11.
- [2] X. Chen, M. Qiu, H. Ding, K. Fu, Y. Fan, *Nano*, 2016, **8**, 5696.
- [3] Y. Li, L. H. Wee, J. A. Martens, I. F. J. Vankelecom, *J. Membr. Sci.*, 2017, **523**, 561.
- [4] H. Huang, Z. Song, N. Wei, L. Shi, Y. Mao, Y. Ying, *Nat. Commun.*, 2013, **4**, 2979.

- [5] A. Ali, A. Ahmed, A. Gad, *Water Sci. Technol.*, 2017, **75**, 439.
- [6] S. You, J. Lu, C. Y. Tang, X. Wang, *Chem. Eng. J.*, 2017, **320**, 532.
- [7] Z. Wang, Z. Wang, S. Lin, H. Jin, S. Gao, Y. Zhu, J. Jin, *Nat. Commun.*, 2018, **9**, 2004.
- [8] A. K. Basumatary, R.V. Kumar, A. K. Ghoshal, G. Pugazhenthii, *J. Membr. Sci.*, 2015, **475**, 521.
- [9] X. Liu, N. K. Demir, Z. Wu, K. Li, *J. Am. Chem. Soc.*, 2015, **137**, 6999.
- [10] C. Yacou, S. Smart, J. C. Diniz da Costa, *Sep. Purif. Technol.*, 2015, **147**, 166.
- [11] Z. Wang, Y. Wei, Z. Xu, Y. Gao, Z. Dong, X. Shi, *J. Membr. Sci.*, 2016, **503**, 69.
- [12] Y. Chu, C. Lin, F. Kleitz, X. Zhao, S. Smart, *Chem. Commun.*, 2013, **49**, 4534.
- [13] M. Elma, D. K. Wang, C. Yacou, J. C. Diniz da Costa, *J. Membr. Sci.*, 2015, **553**, 376.
- [14] M. Elma, D. K. Wang, C. Yacou, J. C. Diniz da Costa, *Desalination*, 2015, **365**, 308.
- [15] S. Bano, A. Mahmood, S.-J. Kim, K.-H. Lee, *J. Mater. Chem. A*, 2015, **3**, 2065.
- [16] Y. Han, Z. Xu, C. Gao, *Adv. Funct. Mater.*, 2013, **23**, 3693.
- [17] Y. Han, Y. Jiang, C. Gao, *ACS Appl. Mater. Interfaces*, 2015, **7**, 8147.
- [18] J.-J. Wang, H.-C. Yang, M.-B. Wu, X. Zhang, Z.-K. Xu, *J. Mater. Chem. A*, 2017, **5**, 16289.
- [19] M. Hu, B. Mi, *Environ. Sci. Technol.*, 2013, **47**, 3715.
- [20] Y. Wei, Y. Zhang, X. Gao, Y. Yuan, B. Su, C. Gao, *Carbon*, 2016, **108**, 568.
